# Supplementary material for: BLISTER-regulated vegetative growth is dependent on the protein kinase domain of ER stress modulator IRE1A in Arabidopsis thaliana
Source: PLOS journal article supplement (doi:10.1371/journal.pgen.1008563), 2019-12-23
Supplement: S4 (10.1371/journal.pgen.1008563.s004) [file journal.pgen.1008563.s004]

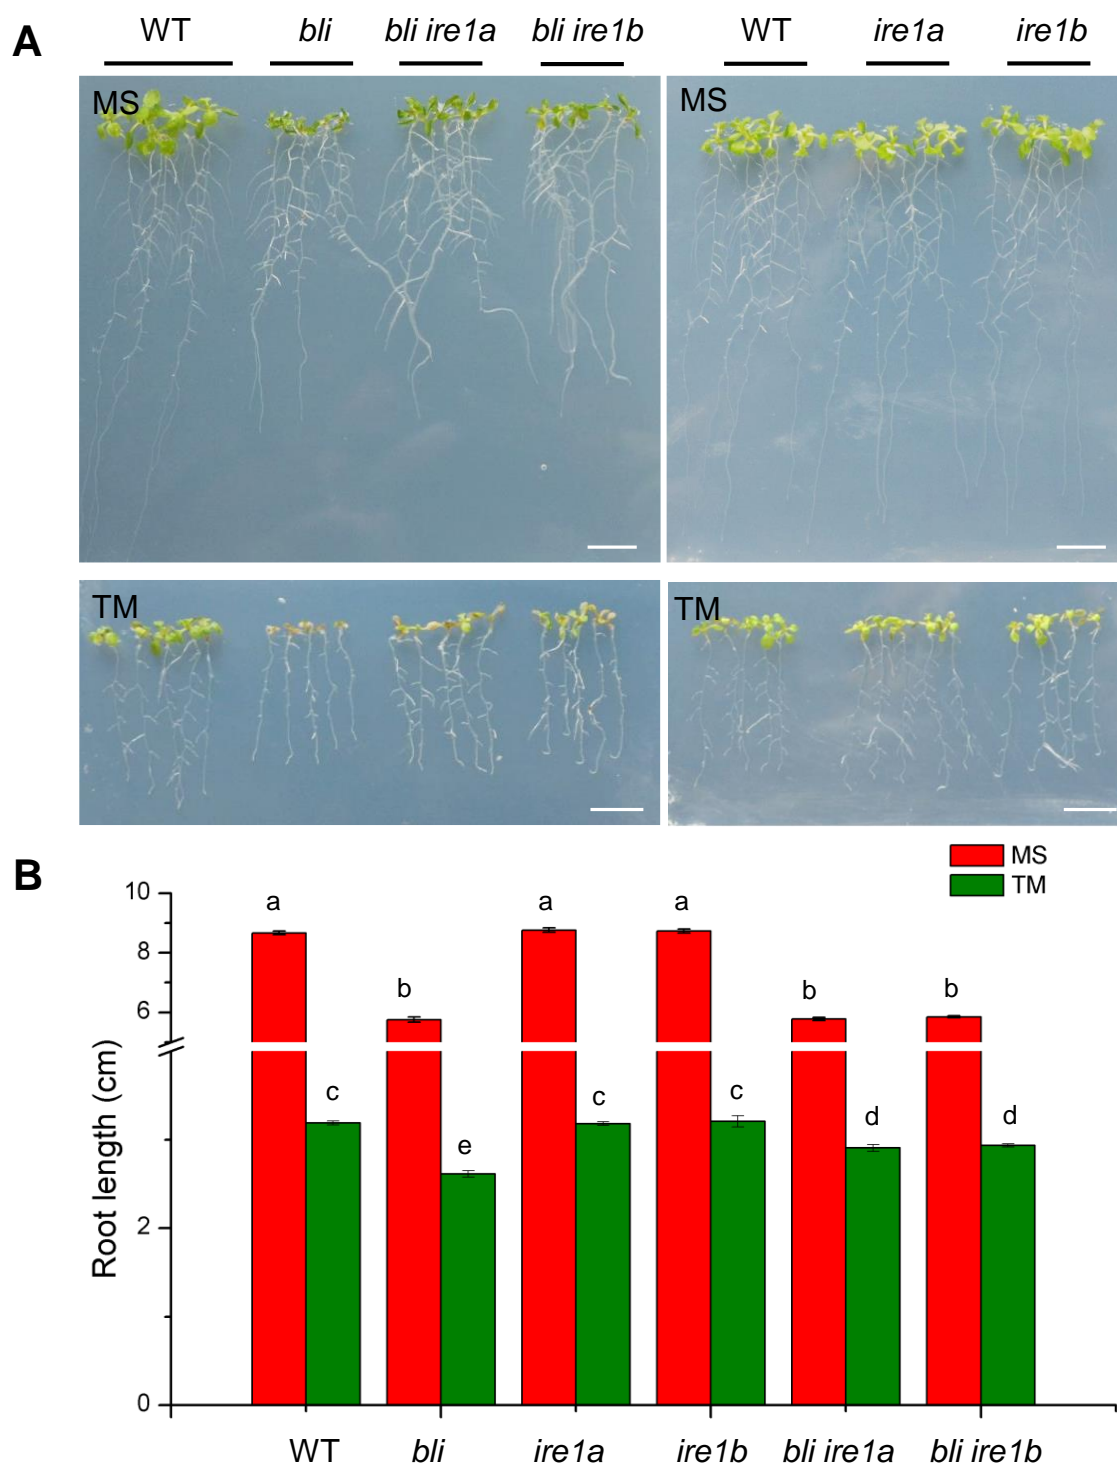

**Fig S4. The *BLI* ER stress related phenotype is partially suppressed by *IRE1A* or *IRE1B* mutation.**

(A-B) ER stress related phenotype of mutant plants. T-DNA mutant of *BLI* (*bli-1*) was crossed to either *IRE1A* mutant (*ire1a*) or *IRE1B* mutant (*ire1b*) to generate the respective double mutant plants. Wild-type (WT), single mutants and double mutants were vertically grown for 6 days on MS medium, transferred to either MS or MS plus 0.3  $\mu\text{g/ml}$  tunicamycin (TM) plates and grown for additional 6 days, then photographed (A). Primary root length was measured (B). There were five plants in each of the three replicates. Error bars represent SE ( $n=3$ ). Letters above the bars indicate significant differences as determined by LSD test following ANOVA analysis ( $p<0.05$ ). Bar= 10 mm.
